# Supplementary material for: A Procedure for Deriving Formulas to Convert Transition Rates to Probabilities for Multistate Markov Models
Source: PubMed Central journal article supplement (PMC5582645; doi:10.1177/0272989x17696997), 2017-04-05
Supplement: Model_1,_redesigned_for_PDF.rjf_online_supp.pdf [file Model_1%2C_redesigned_for_PDF.rjf_online_supp.pdf]

Model 1. Three-state model with forward transitions only

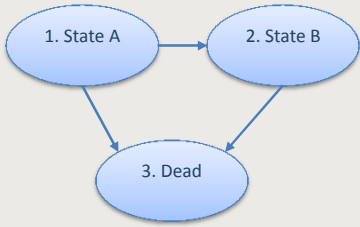

**Matrix Q**

|         | State A | State B  | Dead      |
|---------|---------|----------|-----------|
| State A | -0.01   | 0.002996 | 0.0023346 |
| State B | 0.00    | 0.00     | 0.00099   |
| Dead    | 0.00    | 0.00     | 0.00      |

**Matrix U<sup>(-1)</sup>**

|         | State A | State B | Dead    |
|---------|---------|---------|---------|
| State A | 1.00    | -0.69   | -0.31   |
| State B | 0.00    | 230.57  | -230.57 |
| Dead    | 0.00    | 0.00    | 1.00    |

**Matrix D**

|         | State A | State B | Dead |
|---------|---------|---------|------|
| State A | -0.0053 | 0       | 0    |
| State B | 0       | -0.0010 | 0    |
| Dead    | 0       | 0       | 0    |

**Matrix Exp(D)**

|         | State A | State B | Dead |
|---------|---------|---------|------|
| State A | 0.9947  | 0       | 0    |
| State B | 0       | 0.9990  | 0    |
| Dead    | 0       | 0       | 1    |

**Matrix U**

|         | State A | State B | Dead |
|---------|---------|---------|------|
| State A | 1.0000  | 0.00    | 1    |
| State B | 0       | 0.0043  | 1    |
| Dead    | 0       | 0       | 1    |

**Matrix P(1) = U \* Exp(D) \* U<sup>(-1)</sup>**

|         | State A | State B | Dead  |
|---------|---------|---------|-------|
| State A | 0.995   | 0.003   | 0.002 |
| State B | 0.000   | 0.999   | 0.001 |
| Dead    | 0.000   | 0.000   | 1.000 |

**Transition rates**

| Cycle | From State A to ... |                |             | From State B to ... |             |
|-------|---------------------|----------------|-------------|---------------------|-------------|
|       | State A<br>q11      | State B<br>q12 | Dead<br>q13 | State B<br>-q23     | Dead<br>q23 |
| 0     |                     |                |             |                     |             |
| 1     | -0.01               | 0.0029957      | 0.0023346   | -0.000993           | 0.00099     |
| 2     | -0.01               | 0.0036877      | 0.0027034   | -0.001785           | 0.00179     |
| 3     | -0.01               | 0.0043751      | 0.0030449   | -0.002386           | 0.00239     |
| 4     | -0.01               | 0.0050513      | 0.0033702   | -0.003002           | 0.00300     |
| 5     | -0.01               | 0.0057231      | 0.0036938   | -0.003714           | 0.00371     |
| 6     | -0.01               | 0.0064007      | 0.0040325   | -0.004503           | 0.00450     |
| 7     | -0.01               | 0.0070966      | 0.0044027   | -0.005341           | 0.00534     |
| 8     | -0.01               | 0.0078172      | 0.0048117   | -0.006204           | 0.00620     |
| 9     | -0.01               | 0.0085558      | 0.0052566   | -0.007073           | 0.00707     |
| 10    | -0.02               | 0.009298       | 0.0057349   | -0.007943           | 0.00794     |
| 11    | -0.02               | 0.0100377      | 0.0062397   | -0.008797           | 0.00880     |
| 12    | -0.02               | 0.0107798      | 0.0067639   | -0.009632           | 0.00963     |
| 13    | -0.02               | 0.0115252      | 0.007309    | -0.010455           | 0.01045     |
| 14    | -0.02               | 0.0122756      | 0.0078889   | -0.011283           | 0.01128     |
| 15    | -0.02               | 0.0130302      | 0.0085212   | -0.012136           | 0.01214     |
| 16    | -0.02               | 0.0137858      | 0.0092185   | -0.013032           | 0.01303     |
| 17    | -0.02               | 0.0145385      | 0.0099915   | -0.014013           | 0.01401     |
| 18    | -0.03               | 0.0152881      | 0.0108583   | -0.015122           | 0.01512     |
| 19    | -0.03               | 0.0160405      | 0.0118465   | -0.016375           | 0.01638     |
| 20    | -0.03               | 0.0167826      | 0.0129892   | -0.01778            | 0.01778     |
| 21    | -0.03               | 0.0174968      | 0.0142995   | -0.019324           | 0.01932     |
| 22    | -0.03               | 0.0181637      | 0.0157778   | -0.020995           | 0.02099     |
| 23    | -0.04               | 0.0187573      | 0.0174253   | -0.022768           | 0.02277     |
| 24    | -0.04               | 0.0192367      | 0.0192662   | -0.024639           | 0.02464     |
| 25    | -0.04               | 0.0195705      | 0.0213433   | -0.026604           | 0.02660     |
| 26    | -0.04               | 0.0197615      | 0.0236544   | -0.028664           | 0.02866     |
| 27    | -0.05               | 0.0198191      | 0.0261833   | -0.030823           | 0.03082     |
| 28    | -0.05               | 0.019745       | 0.0289248   | -0.033096           | 0.03310     |
| 29    | -0.05               | 0.0195386      | 0.0318917   | -0.035485           | 0.03548     |
| 30    | -0.05               | 0.0191978      | 0.0351053   | -0.037976           | 0.03798     |
| 31    | -0.06               | 0.0187206      | 0.0385895   | -0.040544           | 0.04054     |
| 32    | -0.06               | 0.0180982      | 0.0423698   | -0.043163           | 0.04316     |
| 33    | -0.06               | 0.0173071      | 0.0464756   | -0.045829           | 0.04583     |
| 34    | -0.07               | 0.0163075      | 0.0509314   | -0.048526           | 0.04853     |
| 35    | -0.07               | 0.0150387      | 0.0557517   | -0.051202           | 0.05120     |
| 36    | -0.07               | 0.0134288      | 0.0609449   | -0.0538             | 0.05380     |
| 37    | -0.08               | 0.0114066      | 0.0665358   | -0.056247           | 0.05625     |
| 38    | -0.08               | 0.008918       | 0.0725969   | -0.058481           | 0.05848     |

**Transition probabilities**

| Cycle | From State A to ... |         |       | From State B to ... |       |
|-------|---------------------|---------|-------|---------------------|-------|
|       | State A             | State B | Dead  | State B             | Dead  |
| 0     |                     |         |       |                     |       |
| 1     | 0.995               | 0.003   | 0.002 | 0.999               | 0.001 |
| 2     | 0.994               | 0.004   | 0.003 | 0.998               | 0.002 |
| 3     | 0.993               | 0.004   | 0.003 | 0.998               | 0.002 |
| 4     | 0.992               | 0.005   | 0.003 | 0.997               | 0.003 |
| 5     | 0.991               | 0.006   | 0.004 | 0.996               | 0.004 |
| 6     | 0.990               | 0.006   | 0.004 | 0.996               | 0.004 |
| 7     | 0.989               | 0.007   | 0.004 | 0.995               | 0.005 |
| 8     | 0.987               | 0.008   | 0.005 | 0.994               | 0.006 |
| 9     | 0.986               | 0.009   | 0.005 | 0.993               | 0.007 |
| 10    | 0.985               | 0.009   | 0.006 | 0.992               | 0.008 |
| 11    | 0.984               | 0.010   | 0.006 | 0.991               | 0.009 |
| 12    | 0.983               | 0.011   | 0.007 | 0.990               | 0.010 |
| 13    | 0.981               | 0.012   | 0.007 | 0.990               | 0.010 |
| 14    | 0.980               | 0.012   | 0.008 | 0.989               | 0.011 |
| 15    | 0.979               | 0.013   | 0.008 | 0.988               | 0.012 |
| 16    | 0.977               | 0.014   | 0.009 | 0.987               | 0.013 |
| 17    | 0.976               | 0.015   | 0.010 | 0.986               | 0.014 |
| 18    | 0.974               | 0.015   | 0.010 | 0.985               | 0.015 |
| 19    | 0.972               | 0.016   | 0.011 | 0.984               | 0.016 |
| 20    | 0.971               | 0.017   | 0.012 | 0.982               | 0.018 |
| 21    | 0.969               | 0.018   | 0.014 | 0.981               | 0.019 |
| 22    | 0.967               | 0.018   | 0.015 | 0.979               | 0.021 |
| 23    | 0.964               | 0.019   | 0.017 | 0.977               | 0.023 |
| 24    | 0.962               | 0.019   | 0.018 | 0.976               | 0.024 |
| 25    | 0.960               | 0.020   | 0.020 | 0.974               | 0.026 |
| 26    | 0.958               | 0.020   | 0.023 | 0.972               | 0.028 |
| 27    | 0.955               | 0.020   | 0.025 | 0.970               | 0.030 |
| 28    | 0.952               | 0.020   | 0.028 | 0.967               | 0.033 |
| 29    | 0.950               | 0.020   | 0.030 | 0.965               | 0.035 |
| 30    | 0.947               | 0.019   | 0.033 | 0.963               | 0.037 |
| 31    | 0.944               | 0.019   | 0.037 | 0.960               | 0.040 |
| 32    | 0.941               | 0.018   | 0.040 | 0.958               | 0.042 |
| 33    | 0.938               | 0.017   | 0.044 | 0.955               | 0.045 |
| 34    | 0.935               | 0.016   | 0.049 | 0.953               | 0.047 |
| 35    | 0.932               | 0.015   | 0.053 | 0.950               | 0.050 |
| 36    | 0.928               | 0.014   | 0.058 | 0.948               | 0.052 |
| 37    | 0.925               | 0.012   | 0.063 | 0.945               | 0.055 |
| 38    | 0.922               | 0.009   | 0.069 | 0.943               | 0.057 |

**State transition model (Markov trace)**

| Cycle | State A | State B | Dead  | Check |
|-------|---------|---------|-------|-------|
| 0     |         |         |       |       |
| 1     | 0.995   | 0.003   | 0.002 | 1.00  |
| 2     | 0.988   | 0.007   | 0.005 | 1.00  |
| 3     | 0.981   | 0.011   | 0.008 | 1.00  |
| 4     | 0.973   | 0.016   | 0.011 | 1.00  |
| 5     | 0.964   | 0.021   | 0.015 | 1.00  |
| 6     | 0.954   | 0.028   | 0.019 | 1.00  |
| 7     | 0.943   | 0.034   | 0.023 | 1.00  |
| 8     | 0.931   | 0.041   | 0.028 | 1.00  |
| 9     | 0.918   | 0.049   | 0.033 | 1.00  |
| 10    | 0.904   | 0.057   | 0.038 | 1.00  |
| 11    | 0.890   | 0.066   | 0.044 | 1.00  |
| 12    | 0.874   | 0.075   | 0.051 | 1.00  |
| 13    | 0.858   | 0.084   | 0.058 | 1.00  |
| 14    | 0.841   | 0.094   | 0.065 | 1.00  |
| 15    | 0.823   | 0.104   | 0.073 | 1.00  |
| 16    | 0.804   | 0.114   | 0.082 | 1.00  |
| 17    | 0.785   | 0.124   | 0.091 | 1.00  |
| 18    | 0.765   | 0.134   | 0.101 | 1.00  |
| 19    | 0.744   | 0.144   | 0.112 | 1.00  |
| 20    | 0.722   | 0.154   | 0.124 | 1.00  |
| 21    | 0.699   | 0.164   | 0.137 | 1.00  |
| 22    | 0.676   | 0.173   | 0.151 | 1.00  |
| 23    | 0.652   | 0.182   | 0.166 | 1.00  |
| 24    | 0.627   | 0.191   | 0.182 | 1.00  |
| 25    | 0.602   | 0.198   | 0.200 | 1.00  |
| 26    | 0.576   | 0.204   | 0.219 | 1.00  |
| 27    | 0.551   | 0.210   | 0.240 | 1.00  |
| 28    | 0.524   | 0.214   | 0.262 | 1.00  |
| 29    | 0.498   | 0.217   | 0.285 | 1.00  |
| 30    | 0.472   | 0.218   | 0.310 | 1.00  |
| 31    | 0.445   | 0.218   | 0.336 | 1.00  |
| 32    | 0.419   | 0.217   | 0.363 | 1.00  |
| 33    | 0.393   | 0.215   | 0.392 | 1.00  |
| 34    | 0.368   | 0.211   | 0.421 | 1.00  |
| 35    | 0.343   | 0.206   | 0.451 | 1.00  |
| 36    | 0.318   | 0.200   | 0.482 | 1.00  |
| 37    | 0.294   | 0.193   | 0.513 | 1.00  |
| 38    | 0.271   | 0.185   | 0.544 | 1.00  |
