# Supplementary material for: A Procedure for Deriving Formulas to Convert Transition Rates to Probabilities for Multistate Markov Models
Source: PubMed Central journal article supplement (PMC5582645; doi:10.1177/0272989x17696997), 2017-04-05
Supplement: Model_2,_redesigned_for_PDF.rjf_online_supp.pdf [file Model_2%2C_redesigned_for_PDF.rjf_online_supp.pdf]

Model 2. Four-state model with forward transitions only

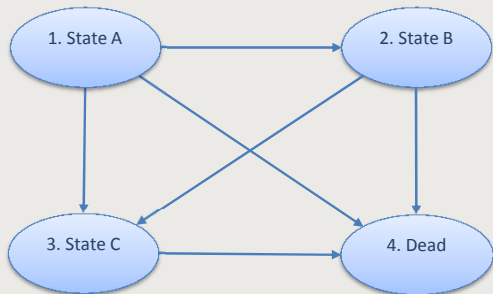

**Matrix Q**

|         | State A | State B | State C | Dead   |
|---------|---------|---------|---------|--------|
| State A | -0.006  | 0.0030  | 0.0006  | 0.0023 |
| State B | 0       | -0.054  | 0.0532  | 0.0010 |
| State C | 0       | 0       | -0.02   | 0.02   |
| Dead    | 0       | 0       | 0       | 0      |

**Matrix D**

|         | State A | State B | State C | Dead |
|---------|---------|---------|---------|------|
| State A | -0.006  | 0       | 0       | 0    |
| State B | 0       | -0.0542 | 0       | 0    |
| State C | 0       | 0       | -0.0200 | 0    |
| Dead    | 0       | 0       | 0       | 0    |

**Matrix U**

|         | State A | State B   | State C | Dead  |
|---------|---------|-----------|---------|-------|
| State A | 1       | 0.0029957 | 0.000   | 0.000 |
| State B | 0       | -0.0483   | -0.0003 | 0.000 |
| State C | 0       | 0         | -0.0003 | 0.000 |
| Dead    | 0       | 0         | 0       | 0.000 |

**Matrix U<sup>(-1)</sup>**

|         | State A | State B | State C   | Dead     |
|---------|---------|---------|-----------|----------|
| State A | 1       | 0.062   | -0.792    | -0.270   |
| State B | 0       | -20.723 | 20.726    | -0.002   |
| State C | 0       | 0       | -3799.755 | 3799.755 |
| Dead    | 0       | 0       | 0         | 3102.472 |

| Cycle | Transition rates    |         |         |        |                     |         |        |                      |       | Transition probabilities |         |         |        |                     |         |
|-------|---------------------|---------|---------|--------|---------------------|---------|--------|----------------------|-------|--------------------------|---------|---------|--------|---------------------|---------|
|       | From State A to ... |         |         |        | From State B to ... |         |        | From State C to Dead |       | From State A to ...      |         |         |        | From State B to ... |         |
|       | State A             | State B | State B | Dead   | State B             | State C | Dead   | State C              | Dead  | State A                  | State B | State C | Dead   | State B             | State C |
|       | a                   | b       | c       | d      | f                   | g       | h      | -i                   | i     |                          |         |         |        |                     |         |
| 0     |                     |         |         |        |                     |         |        |                      |       |                          |         |         |        |                     |         |
| 1     | -0.0059             | 0.0030  | 0.0006  | 0.0023 | -0.054              | 0.0532  | 0.0010 | -0.001               | 0.001 | 0.9941                   | 0.0029  | 0.0007  | 0.0023 | 0.9472              | 0.0518  |
| 2     | -0.0072             | 0.0037  | 0.0008  | 0.0027 | -0.059              | 0.0574  | 0.0018 | -0.001               | 0.001 | 0.9929                   | 0.0036  | 0.0009  | 0.0027 | 0.9425              | 0.0557  |
| 3     | -0.0084             | 0.0044  | 0.0009  | 0.0030 | -0.063              | 0.0603  | 0.0024 | -0.001               | 0.001 | 0.9917                   | 0.0042  | 0.0011  | 0.0030 | 0.9392              | 0.0584  |
| 4     | -0.0095             | 0.0051  | 0.0011  | 0.0034 | -0.065              | 0.0624  | 0.0031 | -0.001               | 0.001 | 0.9905                   | 0.0049  | 0.0013  | 0.0034 | 0.9367              | 0.0603  |
| 5     | -0.0107             | 0.0057  | 0.0013  | 0.0037 | -0.068              | 0.0640  | 0.0038 | -0.001               | 0.001 | 0.9894                   | 0.0055  | 0.0015  | 0.0037 | 0.9345              | 0.0618  |
| 6     | -0.0119             | 0.0064  | 0.0015  | 0.0040 | -0.070              | 0.0654  | 0.0046 | -0.001               | 0.001 | 0.9882                   | 0.0061  | 0.0017  | 0.0040 | 0.9323              | 0.0632  |
| 7     | -0.0132             | 0.0071  | 0.0017  | 0.0044 | -0.072              | 0.0668  | 0.0055 | -0.001               | 0.001 | 0.9869                   | 0.0068  | 0.0019  | 0.0044 | 0.9302              | 0.0644  |
| 8     | -0.0145             | 0.0078  | 0.0019  | 0.0048 | -0.075              | 0.0683  | 0.0064 | -0.001               | 0.001 | 0.9856                   | 0.0075  | 0.0021  | 0.0048 | 0.9280              | 0.0658  |
| 9     | -0.0159             | 0.0086  | 0.0021  | 0.0053 | -0.077              | 0.0696  | 0.0073 | -0.001               | 0.001 | 0.9842                   | 0.0082  | 0.0024  | 0.0052 | 0.9259              | 0.0670  |
| 10    | -0.0174             | 0.0093  | 0.0023  | 0.0057 | -0.079              | 0.0708  | 0.0082 | -0.001               | 0.001 | 0.9828                   | 0.0089  | 0.0026  | 0.0057 | 0.9241              | 0.0680  |
| 11    | -0.0189             | 0.0100  | 0.0026  | 0.0062 | -0.081              | 0.0715  | 0.0091 | -0.001               | 0.001 | 0.9813                   | 0.0096  | 0.0029  | 0.0062 | 0.9226              | 0.0686  |
| 12    | -0.0204             | 0.0108  | 0.0029  | 0.0068 | -0.082              | 0.0717  | 0.0100 | -0.001               | 0.001 | 0.9798                   | 0.0102  | 0.0032  | 0.0067 | 0.9216              | 0.0688  |
| 13    | -0.0220             | 0.0115  | 0.0032  | 0.0073 | -0.082              | 0.0713  | 0.0109 | -0.001               | 0.001 | 0.9783                   | 0.0109  | 0.0035  | 0.0073 | 0.9211              | 0.0684  |
| 14    | -0.0236             | 0.0123  | 0.0035  | 0.0079 | -0.082              | 0.0705  | 0.0117 | -0.001               | 0.001 | 0.9766                   | 0.0116  | 0.0039  | 0.0079 | 0.9211              | 0.0677  |
| 15    | -0.0254             | 0.0130  | 0.0038  | 0.0085 | -0.082              | 0.0693  | 0.0126 | -0.001               | 0.001 | 0.9749                   | 0.0124  | 0.0042  | 0.0085 | 0.9213              | 0.0665  |
| 16    | -0.0272             | 0.0138  | 0.0042  | 0.0092 | -0.081              | 0.0680  | 0.0135 | -0.001               | 0.001 | 0.9732                   | 0.0131  | 0.0046  | 0.0092 | 0.9217              | 0.0652  |
| 17    | -0.0291             | 0.0145  | 0.0046  | 0.0100 | -0.081              | 0.0665  | 0.0146 | -0.001               | 0.001 | 0.9713                   | 0.0138  | 0.0050  | 0.0100 | 0.9222              | 0.0638  |
| 18    | -0.0312             | 0.0153  | 0.0050  | 0.0109 | -0.081              | 0.0651  | 0.0157 | -0.001               | 0.001 | 0.9693                   | 0.0145  | 0.0054  | 0.0108 | 0.9224              | 0.0625  |
| 19    | -0.0333             | 0.0160  | 0.0054  | 0.0118 | -0.081              | 0.0638  | 0.0170 | -0.001               | 0.001 | 0.9672                   | 0.0152  | 0.0058  | 0.0118 | 0.9224              | 0.0613  |
| 20    | -0.0357             | 0.0168  | 0.0059  | 0.0130 | -0.081              | 0.0628  | 0.0185 | -0.001               | 0.001 | 0.9649                   | 0.0158  | 0.0063  | 0.0129 | 0.9220              | 0.0602  |
| 21    | -0.0382             | 0.0175  | 0.0064  | 0.0143 | -0.082              | 0.0620  | 0.0201 | -0.001               | 0.001 | 0.9625                   | 0.0165  | 0.0068  | 0.0142 | 0.9211              | 0.0595  |
| 22    | -0.0410             | 0.0182  | 0.0070  | 0.0158 | -0.084              | 0.0618  | 0.0219 | -0.001               | 0.001 | 0.9598                   | 0.0171  | 0.0074  | 0.0157 | 0.9198              | 0.0592  |
| 23    | -0.0439             | 0.0188  | 0.0077  | 0.0174 | -0.086              | 0.0619  | 0.0237 | -0.001               | 0.001 | 0.9570                   | 0.0176  | 0.0081  | 0.0173 | 0.9180              | 0.0593  |
| 24    | -0.0470             | 0.0192  | 0.0085  | 0.0193 | -0.088              | 0.0623  | 0.0257 | -0.001               | 0.001 | 0.9541                   | 0.0180  | 0.0089  | 0.0191 | 0.9158              | 0.0596  |
| 25    | -0.0504             | 0.0196  | 0.0094  | 0.0213 | -0.091              | 0.0631  | 0.0278 | -0.001               | 0.001 | 0.9509                   | 0.0182  | 0.0098  | 0.0211 | 0.9131              | 0.0603  |
| 26    | -0.0540             | 0.0198  | 0.0106  | 0.0237 | -0.095              | 0.0648  | 0.0300 | -0.001               | 0.001 | 0.9475                   | 0.0183  | 0.0109  | 0.0233 | 0.9096              | 0.0618  |
| 27    | -0.0578             | 0.0198  | 0.0118  | 0.0262 | -0.100              | 0.0673  | 0.0324 | -0.001               | 0.001 | 0.9438                   | 0.0183  | 0.0121  | 0.0258 | 0.9051              | 0.0640  |
| 28    | -0.0619             | 0.0197  | 0.0133  | 0.0289 | -0.106              | 0.0709  | 0.0348 | -0.001               | 0.001 | 0.9399                   | 0.0182  | 0.0135  | 0.0284 | 0.8996              | 0.0673  |
| 29    | -0.0663             | 0.0195  | 0.0149  | 0.0319 | -0.113              | 0.0757  | 0.0375 | -0.001               | 0.001 | 0.9359                   | 0.0179  | 0.0151  | 0.0312 | 0.8929              | 0.0716  |
| 30    | -0.0709             | 0.0192  | 0.0166  | 0.0351 | -0.122              | 0.0818  | 0.0403 | -0.001               | 0.001 | 0.9315                   | 0.0174  | 0.0168  | 0.0343 | 0.8850              | 0.0770  |
| 31    | -0.0759             | 0.0187  | 0.0185  | 0.0386 | -0.133              | 0.0893  | 0.0432 | -0.001               | 0.001 | 0.9270                   | 0.0169  | 0.0186  | 0.0375 | 0.8758              | 0.0836  |
| 32    | -0.0811             | 0.0181  | 0.0207  | 0.0424 | -0.145              | 0.0984  | 0.0463 | -0.001               | 0.001 | 0.9221                   | 0.0162  | 0.0207  | 0.0411 | 0.8653              | 0.0916  |
| 33    | -0.0868             | 0.0173  | 0.0230  | 0.0465 | -0.159              | 0.1091  | 0.0495 | -0.001               | 0.001 | 0.9169                   | 0.0153  | 0.0229  | 0.0449 | 0.8533              | 0.1009  |
| 34    | -0.0929             | 0.0163  | 0.0256  | 0.0509 | -0.174              | 0.1215  | 0.0528 | -0.001               | 0.001 | 0.9113                   | 0.0143  | 0.0254  | 0.0490 | 0.8401              | 0.1114  |
| 35    | -0.0994             | 0.0150  | 0.0286  | 0.0558 | -0.192              | 0.1355  | 0.0562 | -0.001               | 0.001 | 0.9054                   | 0.0130  | 0.0281  | 0.0535 | 0.8256              | 0.1232  |
| 36    | -0.1063             | 0.0134  | 0.0319  | 0.0609 | -0.211              | 0.1514  | 0.0596 | -0.001               | 0.001 | 0.8991                   | 0.0115  | 0.0312  | 0.0582 | 0.8098              | 0.1364  |
| 37    | -0.1137             | 0.0114  | 0.0358  | 0.0665 | -0.232              | 0.1695  | 0.0629 | -0.001               | 0.001 | 0.8925                   | 0.0096  | 0.0347  | 0.0632 | 0.7926              | 0.1511  |
| 38    | -0.1218             | 0.0089  | 0.0403  | 0.0726 | -0.257              | 0.1904  | 0.0662 | -0.001               | 0.001 | 0.8853                   | 0.0074  | 0.0386  | 0.0686 | 0.7737              | 0.1679  |

**Matrix Exp(D)**

|         | State A     | State B  | State C  | Dead     |
|---------|-------------|----------|----------|----------|
| State A | 0.994070947 | 0        | 0        | 0        |
| State B | 0           | 0.947241 | 0        | 0        |
| State C | 0           | 0        | 0.980199 | 0        |
| Dead    | 0           | 0        | 0        | 1.000000 |

**Matrix P(1) = U \* Exp(D) \* U^-1**

|         | State A | State B  | State C  | Dead     |         |
|---------|---------|----------|----------|----------|---------|
| State A | 0.9941  | 0.0029   | -0.0130  | 0.0161   | 1.00000 |
| State B | 0       | 0.947241 | 0.032962 | 0.019797 | 1.00000 |
| State C | 0       | 0        | 0.980199 | 0.019801 | 1.00000 |
| Dead    | 0       | 0        | 0        | 1.000000 | 1.00000 |

| Dead   | From State C to ... |        |
|--------|---------------------|--------|
|        | State C             | Dead   |
| 0.0010 | 0.9990              | 0.0010 |
| 0.0018 | 0.9990              | 0.0010 |
| 0.0024 | 0.9990              | 0.0010 |
| 0.0030 | 0.9990              | 0.0010 |
| 0.0037 | 0.9990              | 0.0010 |
| 0.0045 | 0.9990              | 0.0010 |
| 0.0053 | 0.9990              | 0.0010 |
| 0.0062 | 0.9990              | 0.0010 |
| 0.0071 | 0.9990              | 0.0010 |
| 0.0079 | 0.9990              | 0.0010 |
| 0.0088 | 0.9990              | 0.0010 |
| 0.0096 | 0.9990              | 0.0010 |
| 0.0105 | 0.9990              | 0.0010 |
| 0.0113 | 0.9990              | 0.0010 |
| 0.0121 | 0.9990              | 0.0010 |
| 0.0130 | 0.9990              | 0.0010 |
| 0.0140 | 0.9990              | 0.0010 |
| 0.0151 | 0.9990              | 0.0010 |
| 0.0164 | 0.9990              | 0.0010 |
| 0.0178 | 0.9990              | 0.0010 |
| 0.0193 | 0.9990              | 0.0010 |
| 0.0210 | 0.9990              | 0.0010 |
| 0.0228 | 0.9990              | 0.0010 |
| 0.0246 | 0.9990              | 0.0010 |
| 0.0266 | 0.9990              | 0.0010 |
| 0.0287 | 0.9990              | 0.0010 |
| 0.0308 | 0.9990              | 0.0010 |
| 0.0331 | 0.9990              | 0.0010 |
| 0.0355 | 0.9990              | 0.0010 |
| 0.0380 | 0.9990              | 0.0010 |
| 0.0405 | 0.9990              | 0.0010 |
| 0.0432 | 0.9990              | 0.0010 |
| 0.0458 | 0.9990              | 0.0010 |
| 0.0485 | 0.9990              | 0.0010 |
| 0.0512 | 0.9990              | 0.0010 |
| 0.0538 | 0.9990              | 0.0010 |
| 0.0562 | 0.9990              | 0.0010 |
| 0.0585 | 0.9990              | 0.0010 |

| State transition model (Markov trace) |         |         |       |
|---------------------------------------|---------|---------|-------|
| State A                               | State B | State C | Dead  |
| 1                                     | 0       | 0       | 0     |
| 0.994                                 | 0.003   | 0.001   | 0.002 |
| 0.987                                 | 0.006   | 0.002   | 0.005 |
| 0.979                                 | 0.010   | 0.003   | 0.008 |
| 0.969                                 | 0.014   | 0.005   | 0.011 |
| 0.959                                 | 0.019   | 0.007   | 0.015 |
| 0.948                                 | 0.023   | 0.010   | 0.019 |
| 0.935                                 | 0.028   | 0.013   | 0.023 |
| 0.922                                 | 0.033   | 0.017   | 0.028 |
| 0.907                                 | 0.038   | 0.021   | 0.033 |
| 0.892                                 | 0.043   | 0.026   | 0.039 |
| 0.875                                 | 0.048   | 0.032   | 0.044 |
| 0.857                                 | 0.054   | 0.038   | 0.051 |
| 0.839                                 | 0.059   | 0.045   | 0.058 |
| 0.819                                 | 0.064   | 0.052   | 0.065 |
| 0.799                                 | 0.069   | 0.060   | 0.073 |
| 0.777                                 | 0.074   | 0.068   | 0.081 |
| 0.755                                 | 0.079   | 0.076   | 0.090 |
| 0.732                                 | 0.084   | 0.085   | 0.099 |
| 0.708                                 | 0.088   | 0.094   | 0.109 |
| 0.683                                 | 0.093   | 0.104   | 0.120 |
| 0.657                                 | 0.097   | 0.114   | 0.132 |
| 0.631                                 | 0.100   | 0.125   | 0.144 |
| 0.604                                 | 0.103   | 0.136   | 0.158 |
| 0.576                                 | 0.105   | 0.147   | 0.172 |
| 0.548                                 | 0.106   | 0.159   | 0.187 |
| 0.519                                 | 0.107   | 0.171   | 0.203 |
| 0.490                                 | 0.106   | 0.184   | 0.220 |
| 0.460                                 | 0.105   | 0.198   | 0.237 |
| 0.431                                 | 0.102   | 0.212   | 0.256 |
| 0.401                                 | 0.097   | 0.227   | 0.274 |
| 0.372                                 | 0.092   | 0.242   | 0.294 |
| 0.343                                 | 0.086   | 0.258   | 0.313 |
| 0.315                                 | 0.078   | 0.274   | 0.333 |
| 0.287                                 | 0.070   | 0.291   | 0.352 |
| 0.260                                 | 0.062   | 0.307   | 0.371 |
| 0.233                                 | 0.053   | 0.323   | 0.390 |
| 0.208                                 | 0.044   | 0.339   | 0.408 |
| 0.184                                 | 0.036   | 0.354   | 0.425 |

Check

Intermediate variables

| U=   | 1 | b       | j        | k       | l        | m        |
|------|---|---------|----------|---------|----------|----------|
| 1.00 |   |         |          |         |          |          |
| 1.00 |   | 0.00300 | -0.00019 | 0.00032 | -0.04826 | -0.00026 |
| 1.00 |   | 0.00369 | -0.00026 | 0.00042 | -0.05207 | -0.00035 |
| 1.00 |   | 0.00438 | -0.00032 | 0.00052 | -0.05438 | -0.00044 |
| 1.00 |   | 0.00505 | -0.00039 | 0.00062 | -0.05590 | -0.00053 |
| 1.00 |   | 0.00572 | -0.00045 | 0.00073 | -0.05709 | -0.00062 |
| 1.00 |   | 0.00640 | -0.00052 | 0.00083 | -0.05816 | -0.00071 |
| 1.00 |   | 0.00710 | -0.00059 | 0.00095 | -0.05918 | -0.00081 |
| 1.00 |   | 0.00782 | -0.00067 | 0.00108 | -0.06018 | -0.00092 |
| 1.00 |   | 0.00856 | -0.00075 | 0.00122 | -0.06105 | -0.00104 |
| 1.00 |   | 0.00930 | -0.00084 | 0.00137 | -0.06163 | -0.00116 |
| 1.00 |   | 0.01004 | -0.00092 | 0.00152 | -0.06173 | -0.00128 |
| 1.00 |   | 0.01078 | -0.00100 | 0.00167 | -0.06127 | -0.00139 |
| 1.00 |   | 0.01153 | -0.00108 | 0.00181 | -0.06020 | -0.00150 |
| 1.00 |   | 0.01228 | -0.00115 | 0.00194 | -0.05859 | -0.00160 |
| 1.00 |   | 0.01303 | -0.00121 | 0.00208 | -0.05656 | -0.00169 |
| 1.00 |   | 0.01379 | -0.00128 | 0.00222 | -0.05428 | -0.00178 |
| 1.00 |   | 0.01454 | -0.00133 | 0.00236 | -0.05191 | -0.00187 |
| 1.00 |   | 0.01529 | -0.00139 | 0.00252 | -0.04962 | -0.00196 |
| 1.00 |   | 0.01604 | -0.00146 | 0.00269 | -0.04749 | -0.00206 |
| 1.00 |   | 0.01678 | -0.00153 | 0.00290 | -0.04554 | -0.00218 |
| 1.00 |   | 0.01750 | -0.00161 | 0.00314 | -0.04390 | -0.00231 |
| 1.00 |   | 0.01816 | -0.00170 | 0.00343 | -0.04263 | -0.00247 |
| 1.00 |   | 0.01876 | -0.00181 | 0.00376 | -0.04169 | -0.00265 |
| 1.00 |   | 0.01924 | -0.00194 | 0.00414 | -0.04099 | -0.00287 |
| 1.00 |   | 0.01957 | -0.00208 | 0.00458 | -0.04059 | -0.00312 |
| 1.00 |   | 0.01976 | -0.00227 | 0.00511 | -0.04080 | -0.00343 |
| 1.00 |   | 0.01982 | -0.00250 | 0.00576 | -0.04184 | -0.00383 |
| 1.00 |   | 0.01975 | -0.00279 | 0.00655 | -0.04385 | -0.00432 |
| 1.00 |   | 0.01954 | -0.00315 | 0.00751 | -0.04694 | -0.00495 |
| 1.00 |   | 0.01920 | -0.00358 | 0.00866 | -0.05120 | -0.00572 |
| 1.00 |   | 0.01872 | -0.00411 | 0.01006 | -0.05674 | -0.00669 |
| 1.00 |   | 0.01810 | -0.00475 | 0.01174 | -0.06360 | -0.00789 |
| 1.00 |   | 0.01731 | -0.00552 | 0.01377 | -0.07184 | -0.00936 |
| 1.00 |   | 0.01631 | -0.00642 | 0.01619 | -0.08142 | -0.01116 |
| 1.00 |   | 0.01504 | -0.00749 | 0.01905 | -0.09232 | -0.01333 |
| 1.00 |   | 0.01343 | -0.00874 | 0.02243 | -0.10464 | -0.01594 |
| 1.00 |   | 0.01141 | -0.01022 | 0.02643 | -0.11866 | -0.01910 |
| 1.00 |   | 0.00892 | -0.01199 | 0.03125 | -0.13485 | -0.02300 |

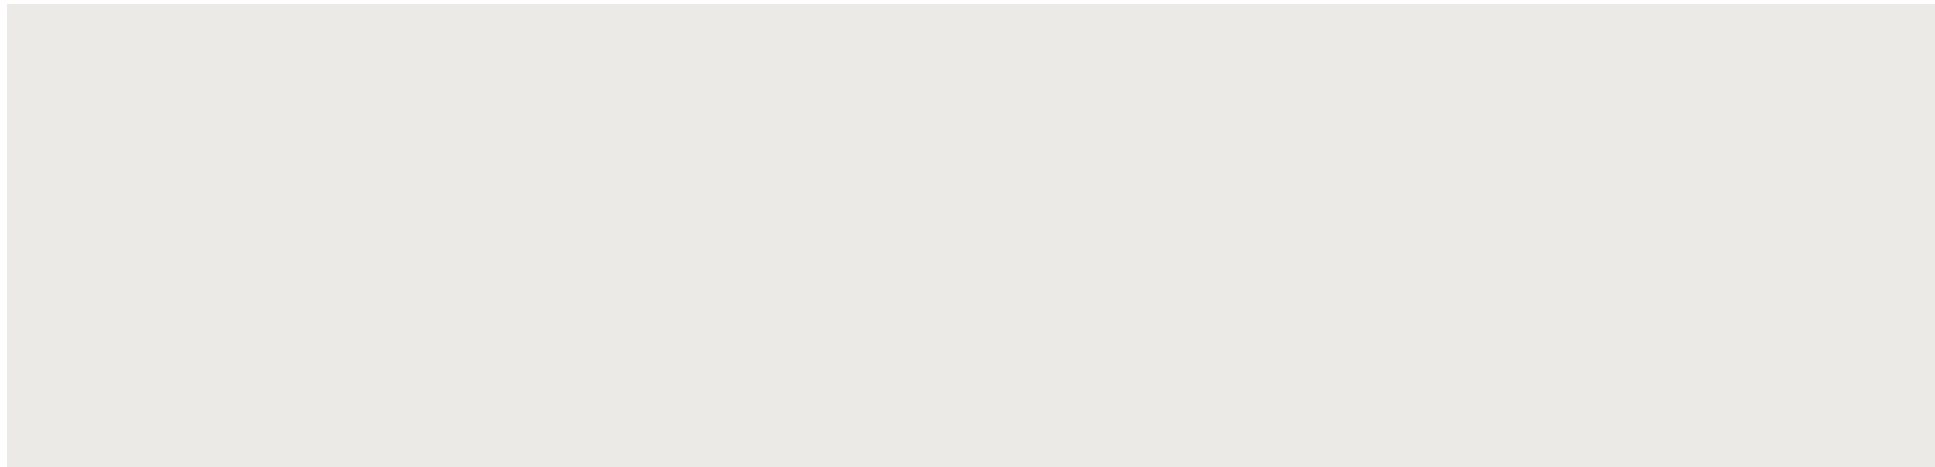

|         |          |         | Uinverse |         |          |          |           |          |          |             |            |            |            |            |           |  |
|---------|----------|---------|----------|---------|----------|----------|-----------|----------|----------|-------------|------------|------------|------------|------------|-----------|--|
| n       | o        | p       | q        | r       | s        | u        | v         | w        | x        | y           | z          | expa       | expff      | exp-i      |           |  |
| 0.00032 | -0.00026 | 0.00032 | 1        | 0.06208 | -0.79236 | -0.26972 | -20.72307 | 20.72556 | -0.00249 | -3799.75550 | 3799.75550 | 3102.47190 | 0.99407095 | 0.94724065 | 0.9990005 |  |
| 0.00042 | -0.00036 | 0.00042 | 1        | 0.07082 | -0.78543 | -0.28539 | -19.20503 | 18.93809 | 0.26694  | -2783.13729 | 2783.13729 | 2354.51763 | 0.99285614 | 0.9424813  | 0.9990005 |  |
| 0.00052 | -0.00045 | 0.00052 | 1        | 0.08045 | -0.78708 | -0.29337 | -18.38773 | 17.96153 | 0.42620  | -2199.59051 | 2199.59051 | 1905.70650 | 0.99167207 | 0.93918115 | 0.9990005 |  |
| 0.00062 | -0.00055 | 0.00062 | 1        | 0.09036 | -0.79067 | -0.29969 | -17.88864 | 17.31412 | 0.57452  | -1818.80538 | 1818.80538 | 1603.13281 | 0.99051239 | 0.93666058 | 0.9990005 |  |
| 0.00073 | -0.00065 | 0.00073 | 1        | 0.10025 | -0.79357 | -0.30667 | -17.51617 | 16.77965 | 0.73653  | -1543.16950 | 1543.16950 | 1378.33875 | 0.98935506 | 0.93445473 | 0.9990005 |  |
| 0.00083 | -0.00075 | 0.00083 | 1        | 0.11005 | -0.79521 | -0.31484 | -17.19413 | 16.29043 | 0.90370  | -1328.38212 | 1328.38212 | 1199.39162 | 0.98816993 | 0.93233788 | 0.9990005 |  |
| 0.00095 | -0.00087 | 0.00095 | 1        | 0.11991 | -0.79568 | -0.32422 | -16.89632 | 15.82986 | 1.06645  | -1152.63920 | 1152.63920 | 1050.33271 | 0.98692592 | 0.9302101  | 0.9990005 |  |
| 0.00108 | -0.00099 | 0.00108 | 1        | 0.12990 | -0.79544 | -0.33446 | -16.61679 | 15.39808 | 1.21871  | -1005.77020 | 1005.77020 | 923.84436  | 0.98560935 | 0.92804477 | 0.9990005 |  |
| 0.00122 | -0.00113 | 0.00122 | 1        | 0.14014 | -0.79502 | -0.34512 | -16.37977 | 15.01820 | 1.36157  | -883.84974  | 883.84974  | 817.48814  | 0.98422849 | 0.92593791 | 0.9990005 |  |
| 0.00137 | -0.00128 | 0.00137 | 1        | 0.15088 | -0.79466 | -0.35622 | -16.22713 | 14.72364 | 1.50349  | -784.26256  | 784.26256  | 729.70736  | 0.98279768 | 0.92406099 | 0.9990005 |  |
| 0.00152 | -0.00142 | 0.00152 | 1        | 0.16260 | -0.79511 | -0.36748 | -16.19861 | 14.54595 | 1.65266  | -703.89981  | 703.89981  | 658.28787  | 0.98132567 | 0.92257685 | 0.9990005 |  |
| 0.00167 | -0.00156 | 0.00167 | 1        | 0.17595 | -0.79719 | -0.37876 | -16.32211 | 14.50205 | 1.82006  | -639.16068  | 639.16068  | 600.38035  | 0.9798104  | 0.92158266 | 0.9990005 |  |
| 0.00181 | -0.00170 | 0.00181 | 1        | 0.19146 | -0.80100 | -0.39046 | -16.61234 | 14.59599 | 2.01635  | -586.82411  | 586.82411  | 553.32255  | 0.97825012 | 0.92110053 | 0.9990005 |  |
| 0.00194 | -0.00184 | 0.00194 | 1        | 0.20953 | -0.80619 | -0.40334 | -17.06872 | 14.81678 | 2.25194  | -543.56086  | 543.56086  | 514.24418  | 0.9766302  | 0.9210565  | 0.9990005 |  |
| 0.00208 | -0.00197 | 0.00208 | 1        | 0.23039 | -0.81232 | -0.41808 | -17.68159 | 15.14645 | 2.53514  | -506.63721  | 506.63721  | 480.74012  | 0.974934   | 0.92132585 | 0.9990005 |  |
| 0.00222 | -0.00211 | 0.00222 | 1        | 0.25397 | -0.81896 | -0.43501 | -18.42275 | 15.55371 | 2.86904  | -473.98098  | 473.98098  | 450.95983  | 0.97315569 | 0.92174018 | 0.9990005 |  |
| 0.00236 | -0.00225 | 0.00236 | 1        | 0.28005 | -0.82541 | -0.45464 | -19.26292 | 16.00070 | 3.26223  | -444.19177  | 444.19177  | 423.64859  | 0.9712932  | 0.92215671 | 0.9990005 |  |
| 0.00252 | -0.00241 | 0.00252 | 1        | 0.30812 | -0.83091 | -0.47721 | -20.15422 | 16.43831 | 3.71591  | -415.72094  | 415.72094  | 397.39535  | 0.96932599 | 0.92240425 | 0.9990005 |  |
| 0.00269 | -0.00258 | 0.00269 | 1        | 0.33778 | -0.83502 | -0.50276 | -21.05782 | 16.83325 | 4.22456  | -387.47080  | 387.47080  | 371.19614  | 0.96721662 | 0.92235869 | 0.9990005 |  |
| 0.00290 | -0.00278 | 0.00290 | 1        | 0.36850 | -0.83726 | -0.53124 | -21.95722 | 17.17375 | 4.78347  | -359.23412  | 359.23412  | 344.87155  | 0.9649359  | 0.92197543 | 0.9990005 |  |
| 0.00314 | -0.00302 | 0.00314 | 1        | 0.39859 | -0.83714 | -0.56145 | -22.78076 | 17.41925 | 5.36151  | -330.89326  | 330.89326  | 318.31833  | 0.96247711 | 0.92114142 | 0.9990005 |  |
| 0.00343 | -0.00330 | 0.00343 | 1        | 0.42604 | -0.83425 | -0.59179 | -23.45535 | 17.53503 | 5.92032  | -302.71785  | 302.71785  | 291.79970  | 0.95984449 | 0.91978236 | 0.9990005 |  |
| 0.00376 | -0.00363 | 0.00376 | 1        | 0.44996 | -0.82873 | -0.62123 | -23.98852 | 17.54378 | 6.44474  | -275.57874  | 275.57874  | 266.15473  | 0.95704994 | 0.91797392 | 0.9990005 |  |
| 0.00414 | -0.00400 | 0.00414 | 1        | 0.46927 | -0.82013 | -0.64914 | -24.39441 | 17.46606 | 6.92835  | -249.89600  | 249.89600  | 241.79952  | 0.95408749 | 0.91576738 | 0.9990005 |  |
| 0.00458 | -0.00444 | 0.00458 | 1        | 0.48212 | -0.80808 | -0.67404 | -24.63491 | 17.29451 | 7.34040  | -225.28811  | 225.28811  | 218.38568  | 0.95089598 | 0.91306939 | 0.9990005 |  |
| 0.00511 | -0.00497 | 0.00511 | 1        | 0.48431 | -0.79135 | -0.69296 | -24.50758 | 16.92557 | 7.58201  | -201.33523  | 201.33523  | 195.51949  | 0.9474628  | 0.90958093 | 0.9990005 |  |
| 0.00576 | -0.00561 | 0.00576 | 1        | 0.47368 | -0.76931 | -0.70437 | -23.89995 | 16.30678 | 7.59317  | -178.30607  | 178.30607  | 173.46517  | 0.94380519 | 0.90513009 | 0.9990005 |  |
| 0.00655 | -0.00639 | 0.00655 | 1        | 0.45033 | -0.74203 | -0.70831 | -22.80746 | 15.44170 | 7.36576  | -156.59993  | 156.59993  | 152.61525  | 0.93993881 | 0.89961733 | 0.9990005 |  |
| 0.00751 | -0.00733 | 0.00751 | 1        | 0.41626 | -0.71048 | -0.70578 | -21.30456 | 14.37716 | 6.92741  | -136.46440  | 136.46440  | 133.21890  | 0.93585662 | 0.8929441  | 0.9990005 |  |
| 0.00866 | -0.00847 | 0.00866 | 1        | 0.37493 | -0.67640 | -0.69854 | -19.52999 | 13.19308 | 6.33691  | -118.08384  | 118.08384  | 115.46546  | 0.93153828 | 0.88504101 | 0.9990005 |  |
| 0.01006 | -0.00985 | 0.01006 | 1        | 0.32996 | -0.64153 | -0.68842 | -17.62537 | 11.96677 | 5.65860  | -101.52959  | 101.52959  | 99.43538   | 0.92695478 | 0.87582682 | 0.9990005 |  |
| 0.01174 | -0.01152 | 0.01174 | 1        | 0.28455 | -0.60735 | -0.67719 | -15.72243 | 10.76597 | 4.95646  | -86.82699   | 86.82699   | 85.16424   | 0.92207464 | 0.86525372 | 0.9990005 |  |
| 0.01377 | -0.01352 | 0.01377 | 1        | 0.24093 | -0.57466 | -0.66627 | -13.92069 | 9.63714  | 4.28355  | -73.94552   | 73.94552   | 72.63276   | 0.91686668 | 0.85331314 | 0.9990005 |  |
| 0.01619 | -0.01592 | 0.01619 | 1        | 0.20030 | -0.54384 | -0.65646 | -12.28267 | 8.61002  | 3.67265  | -62.81416   | 62.81416   | 61.78127   | 0.91131114 | 0.84005627 | 0.9990005 |  |
| 0.01905 | -0.01876 | 0.01905 | 1        | 0.16290 | -0.51492 | -0.64797 | -10.83181 | 7.69653  | 3.13528  | -53.30743   | 53.30743   | 52.49570   | 0.90540493 | 0.8255597  | 0.9990005 |  |
| 0.02243 | -0.02211 | 0.02243 | 1        | 0.12833 | -0.48771 | -0.64063 | -9.55669  | 6.88947  | 2.66723  | -45.22844   | 45.22844   | 44.59062   | 0.89914506 | 0.80981488 | 0.9990005 |  |
| 0.02643 | -0.02609 | 0.02643 | 1        | 0.09613 | -0.46198 | -0.63415 | -8.42720  | 6.17115  | 2.25605  | -38.33397   | 38.33397   | 37.83342   | 0.89249488 | 0.79263067 | 0.9990005 |  |
| 0.03125 | -0.03087 | 0.03125 | 1        | 0.06613 | -0.43762 | -0.62851 | -7.41541  | 5.52388  | 1.89153  | -32.38959   | 32.38959   | 31.99844   | 0.8853464  | 0.77365395 | 0.9990005 |  |
