# Supplementary material for: A Procedure for Deriving Formulas to Convert Transition Rates to Probabilities for Multistate Markov Models
Source: PubMed Central journal article supplement (PMC5582645; doi:10.1177/0272989x17696997), 2017-04-05
Supplement: Model_3,_redesigned_for_PDF.rjf_online_supp.pdf [file Model_3%2C_redesigned_for_PDF.rjf_online_supp.pdf]

Model 3. Four-state model with all forward transition and one backward transition

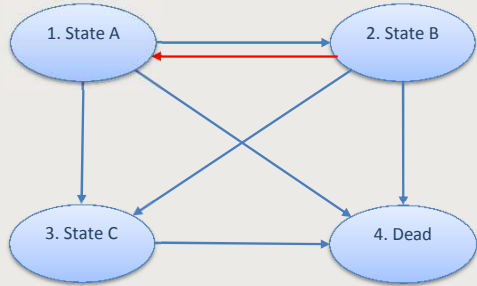

Matrix Q

|         | State A | State B | State C | Dead    |
|---------|---------|---------|---------|---------|
| State A | -0.006  | 0.0030  | 0.0006  | 0.0023  |
| State B | 0.05321 | -0.002  | 0.00099 | 0.00100 |
| State C | 0       | 0       | 0.00    | 0.00102 |
| Dead    | 0       | 0       | 0       | 0       |

Matrix D

|         | State A | State B | State C | Dead |
|---------|---------|---------|---------|------|
| State A | -0.003  | 0       | 0       | 0    |
| State B | 0       | -0.0582 | 0       | 0    |
| State C | 0       | 0       | -0.0010 | 0    |
| Dead    | 0       | 0       | 0       | 0    |

Matrix U

|         | State A | State B | State C | Dead    |
|---------|---------|---------|---------|---------|
| State A | 0.0060  | 0.0060  | 0.0000  | -0.0002 |
| State B | 0.0061  | -0.1046 | 0.0000  | -0.0002 |
| State C | 0.0000  | 0.0000  | -0.0001 | -0.0002 |
| Dead    | 0.0000  | 0.0000  | 0.0000  | -0.0002 |

Matrix U<sup>A(-1)</sup>

|         | State A  | State B | State C    | Dead       |
|---------|----------|---------|------------|------------|
| State A | 157.7162 | 9.0333  | -56.6521   | -110.0974  |
| State B | 9.1897   | -9.0333 | 0.0579     | -0.2143    |
| State C | 0.0000   | 0.0000  | -9322.6497 | 9322.6497  |
| Dead    | 0.0000   | 0.0000  | 0.0000     | -5921.5878 |

| Cycle | Transition rates    |         |         |        |                     |          |         |         |                      |         | Transition probabilities |         |         |        |         |         |
|-------|---------------------|---------|---------|--------|---------------------|----------|---------|---------|----------------------|---------|--------------------------|---------|---------|--------|---------|---------|
|       | From State A to ... |         |         |        | From State B to ... |          |         |         | From State C to Dead |         | From State A to ...      |         |         |        | From St |         |
|       | State A             | State B | State B | Dead   | State A             | State B  | State C | Dead    | State C              | Dead    | State A                  | State B | State C | Dead   | State A | State B |
|       | a                   | b       | c       | d      | f                   | g        | h       | i       | -j                   | j       |                          |         |         |        |         |         |
| 0     |                     |         |         |        |                     |          |         |         |                      |         |                          |         |         |        |         |         |
| 1     | -0.00595            | 0.0030  | 0.0006  | 0.0023 | 0.05321             | -0.05520 | 0.00099 | 0.00100 | 0.00                 | 0.00102 | 0.9941                   | 0.0029  | 0.0006  | 0.0023 | 0.0516  | 0.9464  |
| 2     | -0.00717            | 0.0037  | 0.0008  | 0.0027 | 0.05743             | -0.06024 | 0.00181 | 0.00100 | 0.00                 | 0.00278 | 0.9930                   | 0.0036  | 0.0008  | 0.0027 | 0.0555  | 0.9416  |
| 3     | -0.00836            | 0.0044  | 0.0009  | 0.0030 | 0.06032             | -0.06375 | 0.00243 | 0.00100 | 0.00                 | 0.00350 | 0.9918                   | 0.0042  | 0.0009  | 0.0030 | 0.0582  | 0.9384  |
| 4     | -0.00953            | 0.0051  | 0.0011  | 0.0034 | 0.06236             | -0.06643 | 0.00307 | 0.00100 | 0.00                 | 0.00440 | 0.9907                   | 0.0049  | 0.0011  | 0.0034 | 0.0601  | 0.9359  |
| 5     | -0.01070            | 0.0057  | 0.0013  | 0.0037 | 0.06398             | -0.06879 | 0.00381 | 0.00100 | -0.01                | 0.00529 | 0.9895                   | 0.0055  | 0.0013  | 0.0037 | 0.0615  | 0.9337  |
| 6     | -0.01190            | 0.0064  | 0.0015  | 0.0040 | 0.06543             | -0.07106 | 0.00463 | 0.00100 | -0.01                | 0.00612 | 0.9884                   | 0.0061  | 0.0015  | 0.0040 | 0.0628  | 0.9316  |
| 7     | -0.01316            | 0.0071  | 0.0017  | 0.0044 | 0.06684             | -0.07334 | 0.00550 | 0.00100 | -0.01                | 0.00703 | 0.9872                   | 0.0068  | 0.0017  | 0.0044 | 0.0640  | 0.9295  |
| 8     | -0.01450            | 0.0078  | 0.0019  | 0.0048 | 0.06827             | -0.07568 | 0.00640 | 0.00100 | -0.01                | 0.00797 | 0.9859                   | 0.0075  | 0.0019  | 0.0048 | 0.0653  | 0.9274  |
| 9     | -0.01590            | 0.0086  | 0.0021  | 0.0053 | 0.06963             | -0.07795 | 0.00731 | 0.00100 | -0.01                | 0.00950 | 0.9845                   | 0.0082  | 0.0021  | 0.0052 | 0.0665  | 0.9253  |
| 10    | -0.01735            | 0.0093  | 0.0023  | 0.0057 | 0.07075             | -0.07998 | 0.00822 | 0.00100 | -0.01                | 0.01123 | 0.9831                   | 0.0089  | 0.0023  | 0.0057 | 0.0674  | 0.9234  |
| 11    | -0.01885            | 0.0100  | 0.0026  | 0.0062 | 0.07147             | -0.08158 | 0.00912 | 0.00100 | -0.01                | 0.01230 | 0.9817                   | 0.0095  | 0.0026  | 0.0062 | 0.0680  | 0.9220  |
| 12    | -0.02040            | 0.0108  | 0.0029  | 0.0068 | 0.07167             | -0.08266 | 0.00999 | 0.00100 | -0.01                | 0.01389 | 0.9802                   | 0.0102  | 0.0029  | 0.0067 | 0.0681  | 0.9210  |
| 13    | -0.02199            | 0.0115  | 0.0032  | 0.0073 | 0.07133             | -0.08319 | 0.01085 | 0.00100 | -0.01                | 0.01452 | 0.9786                   | 0.0109  | 0.0032  | 0.0073 | 0.0677  | 0.9206  |
| 14    | -0.02365            | 0.0123  | 0.0035  | 0.0079 | 0.07052             | -0.08323 | 0.01172 | 0.00100 | -0.01                | 0.01480 | 0.9770                   | 0.0116  | 0.0035  | 0.0078 | 0.0669  | 0.9205  |
| 15    | -0.02539            | 0.0130  | 0.0038  | 0.0085 | 0.06934             | -0.08294 | 0.01261 | 0.00100 | -0.02                | 0.01521 | 0.9754                   | 0.0123  | 0.0038  | 0.0085 | 0.0657  | 0.9208  |
| 16    | -0.02721            | 0.0138  | 0.0042  | 0.0092 | 0.06796             | -0.08249 | 0.01354 | 0.00100 | -0.02                | 0.01673 | 0.9736                   | 0.0131  | 0.0042  | 0.0091 | 0.0643  | 0.9213  |
| 17    | -0.02913            | 0.0145  | 0.0046  | 0.0100 | 0.06649             | -0.08204 | 0.01456 | 0.00100 | -0.02                | 0.01862 | 0.9718                   | 0.0138  | 0.0046  | 0.0099 | 0.0629  | 0.9217  |
| 18    | -0.03115            | 0.0153  | 0.0050  | 0.0109 | 0.06506             | -0.08177 | 0.01571 | 0.00100 | -0.02                | 0.02012 | 0.9698                   | 0.0145  | 0.0050  | 0.0108 | 0.0615  | 0.9219  |
| 19    | -0.03333            | 0.0160  | 0.0054  | 0.0118 | 0.06381             | -0.08182 | 0.01701 | 0.00100 | -0.02                | 0.02253 | 0.9677                   | 0.0151  | 0.0054  | 0.0117 | 0.0603  | 0.9219  |
| 20    | -0.03569            | 0.0168  | 0.0059  | 0.0130 | 0.06276             | -0.08224 | 0.01848 | 0.00100 | -0.03                | 0.02528 | 0.9654                   | 0.0158  | 0.0059  | 0.0128 | 0.0592  | 0.9215  |
| 21    | -0.03825            | 0.0175  | 0.0064  | 0.0143 | 0.06204             | -0.08314 | 0.02010 | 0.00100 | -0.03                | 0.02829 | 0.9630                   | 0.0165  | 0.0064  | 0.0141 | 0.0584  | 0.9207  |
| 22    | -0.04098            | 0.0182  | 0.0070  | 0.0158 | 0.06176             | -0.08462 | 0.02185 | 0.00100 | -0.03                | 0.03074 | 0.9604                   | 0.0171  | 0.0070  | 0.0156 | 0.0580  | 0.9194  |
| 23    | -0.04390            | 0.0188  | 0.0077  | 0.0174 | 0.06186             | -0.08659 | 0.02372 | 0.00100 | -0.03                | 0.03219 | 0.9576                   | 0.0176  | 0.0076  | 0.0172 | 0.0580  | 0.9176  |
| 24    | -0.04700            | 0.0192  | 0.0085  | 0.0193 | 0.06229             | -0.08899 | 0.02571 | 0.00100 | -0.03                | 0.03344 | 0.9547                   | 0.0180  | 0.0084  | 0.0190 | 0.0582  | 0.9154  |
| 25    | -0.05035            | 0.0196  | 0.0094  | 0.0213 | 0.06314             | -0.09194 | 0.02780 | 0.00100 | -0.03                | 0.03435 | 0.9515                   | 0.0182  | 0.0093  | 0.0210 | 0.0588  | 0.9127  |
| 26    | -0.05397            | 0.0198  | 0.0106  | 0.0237 | 0.06476             | -0.09577 | 0.03001 | 0.00100 | -0.04                | 0.03513 | 0.9481                   | 0.0183  | 0.0104  | 0.0232 | 0.0601  | 0.9093  |
| 27    | -0.05784            | 0.0198  | 0.0118  | 0.0262 | 0.06733             | -0.10068 | 0.03235 | 0.00100 | -0.04                | 0.03596 | 0.9444                   | 0.0183  | 0.0116  | 0.0257 | 0.0622  | 0.9048  |
| 28    | -0.06194            | 0.0197  | 0.0133  | 0.0289 | 0.07094             | -0.10679 | 0.03484 | 0.00100 | -0.04                | 0.03710 | 0.9406                   | 0.0182  | 0.0130  | 0.0283 | 0.0652  | 0.8994  |
| 29    | -0.06629            | 0.0195  | 0.0149  | 0.0319 | 0.07574             | -0.11423 | 0.03749 | 0.00100 | -0.04                | 0.03868 | 0.9365                   | 0.0179  | 0.0144  | 0.0312 | 0.0692  | 0.8927  |
| 30    | -0.07092            | 0.0192  | 0.0166  | 0.0351 | 0.08182             | -0.12312 | 0.04030 | 0.00100 | -0.04                | 0.03995 | 0.9323                   | 0.0174  | 0.0161  | 0.0342 | 0.0743  | 0.8849  |
| 31    | -0.07585            | 0.0187  | 0.0185  | 0.0386 | 0.08934             | -0.13359 | 0.04325 | 0.00100 | -0.04                | 0.04055 | 0.9277                   | 0.0169  | 0.0179  | 0.0375 | 0.0805  | 0.8757  |
| 32    | -0.08113            | 0.0181  | 0.0207  | 0.0424 | 0.09842             | -0.14573 | 0.04631 | 0.00100 | -0.04                | 0.04169 | 0.9229                   | 0.0162  | 0.0198  | 0.0411 | 0.0879  | 0.8652  |
| 33    | -0.08679            | 0.0173  | 0.0230  | 0.0465 | 0.10912             | -0.15963 | 0.04950 | 0.00100 | -0.05                | 0.04516 | 0.9177                   | 0.0153  | 0.0219  | 0.0450 | 0.0965  | 0.8533  |
| 34    | -0.09287            | 0.0163  | 0.0256  | 0.0509 | 0.12147             | -0.17529 | 0.05281 | 0.00100 | -0.05                | 0.04795 | 0.9122                   | 0.0143  | 0.0243  | 0.0493 | 0.1063  | 0.8401  |
| 35    | -0.09937            | 0.0150  | 0.0286  | 0.0558 | 0.13550             | -0.19269 | 0.05620 | 0.00100 | -0.05                | 0.05265 | 0.9063                   | 0.0130  | 0.0269  | 0.0538 | 0.1172  | 0.8256  |
| 36    | -0.10631            | 0.0134  | 0.0319  | 0.0609 | 0.15135             | -0.21195 | 0.05960 | 0.00100 | -0.06                | 0.06079 | 0.9000                   | 0.0115  | 0.0297  | 0.0588 | 0.1292  | 0.8099  |
| 37    | -0.11373            | 0.0114  | 0.0358  | 0.0665 | 0.16945             | -0.23340 | 0.06295 | 0.00100 | -0.07                | 0.06839 | 0.8933                   | 0.0096  | 0.0330  | 0.0641 | 0.1426  | 0.7926  |
| 38    | -0.12178            | 0.0089  | 0.0403  | 0.0726 | 0.19042             | -0.25763 | 0.06621 | 0.00100 | -0.08                | 0.08177 | 0.8861                   | 0.0074  | 0.0366  | 0.0699 | 0.1577  | 0.7736  |

**Matrix Exp(D)**

|         | State A | State B | State C | Dead   |
|---------|---------|---------|---------|--------|
| State A | 0.9971  | 0.0000  | 0.0000  | 0.0000 |
| State B | 0.0000  | 0.9434  | 0.0000  | 0.0000 |
| State C | 0.0000  | 0.0000  | 0.9990  | 0.0000 |
| Dead    | 0.0000  | 0.0000  | 0.0000  | 1.0000 |

**Matrix P(1) = U \* Exp(D) \* U^(-1)**

|         | State A | State B | State C | Dead   |
|---------|---------|---------|---------|--------|
| State A | 0.9941  | 0.0029  | 0.0006  | 0.0023 |
| State B | 0.0516  | 0.9464  | 0.0010  | 0.0010 |
| State C | 0.0000  | 0.0000  | 0.9990  | 0.0010 |
| Dead    | 0.0000  | 0.0000  | 0.0000  | 1.0000 |

| State B to ... |        | From State C to Dead |        |
|----------------|--------|----------------------|--------|
| State C        | Dead   | State C              | Dead   |
| 0.0010         | 0.0010 | 0.9990               | 0.0010 |
| 0.0018         | 0.0010 | 0.9972               | 0.0028 |
| 0.0024         | 0.0011 | 0.9965               | 0.0035 |
| 0.0030         | 0.0011 | 0.9956               | 0.0044 |
| 0.0037         | 0.0011 | 0.9947               | 0.0053 |
| 0.0045         | 0.0011 | 0.9939               | 0.0061 |
| 0.0053         | 0.0011 | 0.9930               | 0.0070 |
| 0.0062         | 0.0011 | 0.9921               | 0.0079 |
| 0.0071         | 0.0012 | 0.9905               | 0.0095 |
| 0.0079         | 0.0012 | 0.9888               | 0.0112 |
| 0.0088         | 0.0012 | 0.9878               | 0.0122 |
| 0.0096         | 0.0013 | 0.9862               | 0.0138 |
| 0.0104         | 0.0013 | 0.9856               | 0.0144 |
| 0.0113         | 0.0013 | 0.9853               | 0.0147 |
| 0.0121         | 0.0013 | 0.9849               | 0.0151 |
| 0.0130         | 0.0014 | 0.9834               | 0.0166 |
| 0.0140         | 0.0014 | 0.9815               | 0.0185 |
| 0.0151         | 0.0015 | 0.9801               | 0.0199 |
| 0.0163         | 0.0015 | 0.9777               | 0.0223 |
| 0.0177         | 0.0016 | 0.9750               | 0.0250 |
| 0.0192         | 0.0017 | 0.9721               | 0.0279 |
| 0.0208         | 0.0018 | 0.9697               | 0.0303 |
| 0.0226         | 0.0018 | 0.9683               | 0.0317 |
| 0.0244         | 0.0019 | 0.9671               | 0.0329 |
| 0.0264         | 0.0021 | 0.9662               | 0.0338 |
| 0.0284         | 0.0022 | 0.9655               | 0.0345 |
| 0.0306         | 0.0023 | 0.9647               | 0.0353 |
| 0.0329         | 0.0025 | 0.9636               | 0.0364 |
| 0.0353         | 0.0028 | 0.9621               | 0.0379 |
| 0.0378         | 0.0031 | 0.9608               | 0.0392 |
| 0.0404         | 0.0034 | 0.9603               | 0.0397 |
| 0.0431         | 0.0038 | 0.9592               | 0.0408 |
| 0.0459         | 0.0043 | 0.9558               | 0.0442 |
| 0.0487         | 0.0049 | 0.9532               | 0.0468 |
| 0.0515         | 0.0057 | 0.9487               | 0.0513 |
| 0.0542         | 0.0068 | 0.9410               | 0.0590 |
| 0.0569         | 0.0079 | 0.9339               | 0.0661 |
| 0.0593         | 0.0095 | 0.9215               | 0.0785 |

| State transition model (Markov trace) |         |         |             |
|---------------------------------------|---------|---------|-------------|
| State A                               | State B | State C | Dead        |
| 1.000                                 | 0.000   | 0.000   |             |
| 0.994                                 | 0.003   | 0.001   | 0.002329516 |
| 0.987                                 | 0.006   | 0.001   | 0.005015201 |
| 0.980                                 | 0.010   | 0.002   | 0.008024343 |
| 0.971                                 | 0.014   | 0.003   | 0.011336107 |
| 0.962                                 | 0.019   | 0.005   | 0.014943675 |
| 0.952                                 | 0.023   | 0.006   | 0.018855907 |
| 0.941                                 | 0.028   | 0.008   | 0.023097331 |
| 0.930                                 | 0.033   | 0.010   | 0.027697964 |
| 0.917                                 | 0.038   | 0.012   | 0.03268983  |
| 0.904                                 | 0.043   | 0.014   | 0.038099636 |
| 0.891                                 | 0.049   | 0.017   | 0.043935395 |
| 0.876                                 | 0.054   | 0.019   | 0.050213742 |
| 0.861                                 | 0.059   | 0.022   | 0.056925242 |
| 0.846                                 | 0.065   | 0.026   | 0.064077185 |
| 0.829                                 | 0.070   | 0.029   | 0.071699085 |
| 0.812                                 | 0.075   | 0.033   | 0.079858543 |
| 0.793                                 | 0.080   | 0.038   | 0.088614177 |
| 0.774                                 | 0.086   | 0.042   | 0.09800792  |
| 0.755                                 | 0.091   | 0.047   | 0.108149755 |
| 0.734                                 | 0.096   | 0.052   | 0.119149098 |
| 0.712                                 | 0.100   | 0.057   | 0.131114299 |
| 0.690                                 | 0.104   | 0.062   | 0.144098874 |
| 0.667                                 | 0.108   | 0.068   | 0.158107479 |
| 0.643                                 | 0.111   | 0.074   | 0.173189269 |
| 0.618                                 | 0.113   | 0.080   | 0.189391764 |
| 0.593                                 | 0.114   | 0.087   | 0.206753385 |
| 0.567                                 | 0.114   | 0.094   | 0.225299715 |
| 0.541                                 | 0.113   | 0.102   | 0.245060703 |
| 0.514                                 | 0.110   | 0.110   | 0.266076986 |
| 0.487                                 | 0.106   | 0.118   | 0.288307788 |
| 0.461                                 | 0.101   | 0.126   | 0.311651875 |
| 0.434                                 | 0.095   | 0.135   | 0.336140893 |
| 0.408                                 | 0.088   | 0.143   | 0.362046    |
| 0.381                                 | 0.080   | 0.150   | 0.389227421 |
| 0.355                                 | 0.071   | 0.157   | 0.417888656 |
| 0.328                                 | 0.061   | 0.162   | 0.448452711 |
| 0.302                                 | 0.052   | 0.165   | 0.480678836 |
| 0.276                                 | 0.042   | 0.167   | 0.515282841 |

Check

Intermediate variables

| U=   |        |         |         |           |            |         |         |
|------|--------|---------|---------|-----------|------------|---------|---------|
| m    | n      | o       | p       | q         | r          | s       |         |
| 1.00 |        |         |         |           |            |         |         |
| 1.00 | 0.0060 | 0.0000  | -0.0002 | 0.0060951 | -0.1046059 | 0.0000  | -0.0002 |
| 1.00 | 0.0074 | -0.0001 | -0.0002 | 0.0074574 | -0.1135968 | -0.0001 | -0.0002 |
| 1.00 | 0.0088 | -0.0001 | -0.0003 | 0.0088261 | -0.1195943 | -0.0001 | -0.0003 |
| 1.00 | 0.0101 | -0.0001 | -0.0003 | 0.0101647 | -0.1239675 | -0.0001 | -0.0003 |
| 1.00 | 0.0114 | -0.0001 | -0.0004 | 0.0114742 | -0.1276544 | -0.0001 | -0.0004 |
| 1.00 | 0.0128 | -0.0001 | -0.0004 | 0.0127783 | -0.1310971 | -0.0001 | -0.0004 |
| 1.00 | 0.0142 | -0.0001 | -0.0005 | 0.0141093 | -0.1344783 | -0.0001 | -0.0005 |
| 1.00 | 0.0156 | -0.0002 | -0.0006 | 0.0154866 | -0.1378468 | -0.0002 | -0.0006 |
| 1.00 | 0.0171 | -0.0002 | -0.0006 | 0.0169013 | -0.1410031 | -0.0002 | -0.0006 |
| 1.00 | 0.0186 | -0.0002 | -0.0007 | 0.0183275 | -0.1435779 | -0.0002 | -0.0007 |
| 1.00 | 0.0201 | -0.0003 | -0.0008 | 0.0197581 | -0.1452255 | -0.0002 | -0.0008 |
| 1.00 | 0.0216 | -0.0003 | -0.0009 | 0.0212044 | -0.1457376 | -0.0003 | -0.0009 |
| 1.00 | 0.0231 | -0.0003 | -0.0010 | 0.0226694 | -0.1450618 | -0.0003 | -0.0010 |
| 1.00 | 0.0246 | -0.0004 | -0.0011 | 0.0241575 | -0.1433309 | -0.0003 | -0.0011 |
| 1.00 | 0.0261 | -0.0004 | -0.0012 | 0.0256699 | -0.1407819 | -0.0004 | -0.0012 |
| 1.00 | 0.0276 | -0.0005 | -0.0013 | 0.0272014 | -0.1377628 | -0.0004 | -0.0013 |
| 1.00 | 0.0291 | -0.0005 | -0.0014 | 0.0287335 | -0.1345599 | -0.0005 | -0.0014 |
| 1.00 | 0.0306 | -0.0005 | -0.0016 | 0.0302586 | -0.1314934 | -0.0005 | -0.0016 |
| 1.00 | 0.0321 | -0.0006 | -0.0017 | 0.0317933 | -0.1287699 | -0.0005 | -0.0017 |
| 1.00 | 0.0336 | -0.0006 | -0.0019 | 0.0333265 | -0.1264127 | -0.0006 | -0.0019 |
| 1.00 | 0.0350 | -0.0007 | -0.0021 | 0.0348407 | -0.1246341 | -0.0006 | -0.0021 |
| 1.00 | 0.0363 | -0.0008 | -0.0023 | 0.0363123 | -0.1235807 | -0.0007 | -0.0023 |
| 1.00 | 0.0375 | -0.0009 | -0.0026 | 0.0377097 | -0.1230829 | -0.0008 | -0.0026 |
| 1.00 | 0.0385 | -0.0010 | -0.0030 | 0.0389767 | -0.1229627 | -0.0009 | -0.0030 |
| 1.00 | 0.0391 | -0.0011 | -0.0034 | 0.0400952 | -0.1232808 | -0.0010 | -0.0034 |
| 1.00 | 0.0395 | -0.0012 | -0.0039 | 0.0410615 | -0.1246689 | -0.0012 | -0.0039 |
| 1.00 | 0.0396 | -0.0014 | -0.0045 | 0.041851  | -0.1275332 | -0.0015 | -0.0045 |
| 1.00 | 0.0395 | -0.0016 | -0.0052 | 0.0424148 | -0.1321054 | -0.0018 | -0.0052 |
| 1.00 | 0.0391 | -0.0019 | -0.0061 | 0.0427113 | -0.1385879 | -0.0022 | -0.0061 |
| 1.00 | 0.0384 | -0.0022 | -0.0072 | 0.0427089 | -0.1471155 | -0.0026 | -0.0072 |
| 1.00 | 0.0374 | -0.0025 | -0.0085 | 0.0423814 | -0.1578542 | -0.0032 | -0.0085 |
| 1.00 | 0.0362 | -0.0030 | -0.0100 | 0.0416914 | -0.1708982 | -0.0039 | -0.0100 |
| 1.00 | 0.0346 | -0.0035 | -0.0120 | 0.0405644 | -0.1862354 | -0.0046 | -0.0120 |
| 1.00 | 0.0326 | -0.0041 | -0.0143 | 0.0388937 | -0.2037247 | -0.0055 | -0.0143 |
| 1.00 | 0.0301 | -0.0048 | -0.0171 | 0.0365237 | -0.2231651 | -0.0065 | -0.0171 |
| 1.00 | 0.0269 | -0.0056 | -0.0205 | 0.033248  | -0.2445254 | -0.0075 | -0.0205 |
| 1.00 | 0.0228 | -0.0066 | -0.0246 | 0.0288315 | -0.2681583 | -0.0089 | -0.0246 |
| 1.00 | 0.0178 | -0.0077 | -0.0297 | 0.0230457 | -0.2947543 | -0.0103 | -0.0297 |
