# Supplementary material for: A Procedure for Deriving Formulas to Convert Transition Rates to Probabilities for Multistate Markov Models
Source: PubMed Central journal article supplement (PMC5582645; doi:10.1177/0272989x17696997), 2017-04-05
Supplement: Model_4,_redesigned_for_PDF.rjf_online_supp.pdf [file Model_4%2C_redesigned_for_PDF.rjf_online_supp.pdf]

Universe

| y         |   | aa     | bb      | cc      | dd      | ff       | gg        | hh        | ii        | jj          | kk          | ll          | mm          | expa      | expg      | explk     |
|-----------|---|--------|---------|---------|---------|----------|-----------|-----------|-----------|-------------|-------------|-------------|-------------|-----------|-----------|-----------|
|           | 1 |        |         |         |         |          |           |           |           |             |             |             |             |           |           |           |
| -2.87E-06 | 1 | 0.0366 | -0.5089 | 0.0396  | -0.5673 | -9.5567  | 1.7375    | 1.0117    | 6.8075    | 1693.4293   | -1119.7411  | -573.6882   | -348513.514 | 0.9916424 | 0.8931223 | 0.9969799 |
| -1.91E-06 | 1 | 0.1421 | -3.0958 | 1.0351  | 0.9186  | -41.2544 | 31.9750   | 12.4178   | -3.1383   | 24772.6855  | -13206.2400 | -11566.4455 | -523048.024 | 0.9915682 | 0.9678217 | 0.9931205 |
| -4.63E-06 | 1 | 0.1836 | 1.3781  | -1.6751 | -0.8866 | -43.3114 | 45.6578   | 3.7825    | -6.1289   | -12804.3466 | 8760.2018   | 4044.1448   | -215852.058 | 0.9900901 | 0.9674922 | 0.9860228 |
| -8.08E-06 | 1 | 0.2196 | 0.6077  | -1.2301 | -0.5972 | -45.0251 | 77.0099   | -18.5743  | -13.4105  | -8131.8853  | 5949.7933   | 2182.0920   | -123825.612 | 0.9888995 | 0.9671784 | 0.9785543 |
| -1.36E-05 | 1 | 0.2613 | 0.3610  | -1.1107 | -0.5116 | -47.0224 | 751.3890  | -529.3473 | -175.0192 | -39918.8230 | 30261.1526  | 9657.6704   | -73597.3967 | 0.987648  | 0.9668659 | 0.9680768 |
| -1.81E-05 | 1 | 0.3033 | 0.3148  | -1.1222 | -0.4960 | -48.9280 | -188.6501 | 188.0086  | 49.5695   | 7523.1444   | -5808.3078  | -1714.8366  | -55102.5168 | 0.9864964 | 0.9665388 | 0.9615382 |
| -2.26E-05 | 1 | 0.3653 | 0.3247  | -1.1970 | -0.4930 | -51.6710 | -111.0424 | 132.7071  | 30.0064   | 3749.2080   | -2952.1894  | -797.0185   | -44183.3525 | 0.9850622 | 0.9661813 | 0.9572312 |
| -2.61E-05 | 1 | 0.4324 | 0.3639  | -1.2984 | -0.4979 | -54.3847 | -100.0661 | 127.5125  | 26.9383   | 3144.4598   | -2499.7488  | -644.7110   | -38284.3759 | 0.9837094 | 0.9657867 | 0.9553456 |
| -2.98E-05 | 1 | 0.5134 | 0.4187  | -1.4266 | -0.5055 | -57.6699 | -96.4066  | 128.3061  | 25.7704   | 2852.3369   | -2283.4190  | -568.9179   | -33525.7882 | 0.9822431 | 0.9653578 | 0.9538771 |
| -3.4E-05  | 1 | 0.6166 | 0.5040  | -1.5969 | -0.5237 | -62.5207 | -100.5037 | 136.8193  | 26.2051   | 2826.5521   | -2280.2592  | -546.2930   | -29428.7886 | 0.9804545 | 0.9648972 | 0.9529668 |
| -3.65E-05 | 1 | 0.6847 | 0.5764  | -1.7246 | -0.5366 | -65.3187 | -109.6178 | 147.2678  | 27.6687   | 3081.8534   | -2496.8594  | -584.9940   | -27383.9932 | 0.9792901 | 0.9644118 | 0.9529866 |
| -3.94E-05 | 1 | 0.7530 | 0.6421  | -1.8157 | -0.5794 | -67.8962 | -114.6566 | 150.6342  | 31.9186   | 3177.6272   | -2508.9719  | -668.6553   | -25406.8797 | 0.9782103 | 0.9639084 | 0.9525598 |
| -4.24E-05 | 1 | 0.8356 | 0.7376  | -1.9237 | -0.6494 | -71.5190 | -125.6038 | 157.6885  | 39.4343   | 3461.1873   | -2629.0878  | -832.0995   | -23611.8713 | 0.9769507 | 0.9633858 | 0.9524769 |
| -4.78E-05 | 1 | 0.9110 | 0.8094  | -2.0202 | -0.7003 | -73.1539 | -129.3380 | 160.3698  | 42.1221   | 3538.6228   | -2675.2135  | -863.4093   | -20899.8703 | 0.9754213 | 0.9621782 | 0.9513554 |
| -6.12E-05 | 1 | 0.9216 | 0.7569  | -1.9088 | -0.7697 | -68.2450 | -110.6096 | 138.1418  | 40.7128   | 3002.2219   | -2260.6003  | -741.6216   | -16348.5361 | 0.9732717 | 0.9591143 | 0.9473517 |
| -8.23E-05 | 1 | 0.9050 | 0.6437  | -1.7331 | -0.8156 | -61.9213 | -82.1517  | 108.9657  | 35.1072   | 2124.4802   | -1614.1825  | -510.2977   | -12149.8841 | 0.970844  | 0.9552912 | 0.9409983 |
| -0.000107 | 1 | 0.8328 | 0.5798  | -1.5354 | -0.8772 | -52.5035 | -79.9750  | 96.9564   | 35.5221   | 2367.0084   | -1804.3202  | -562.6883   | -9353.85215 | 0.9682195 | 0.949953  | 0.9375617 |
| -0.000137 | 1 | 0.7012 | 0.5428  | -1.3099 | -0.9341 | -40.7824 | -163.1398 | 148.6377  | 55.2845   | 6775.4741   | -5153.9905  | -1621.4836  | -7285.84195 | 0.9652721 | 0.9418911 | 0.9371937 |
| -0.000162 | 1 | 0.5794 | 0.5519  | -1.1651 | -0.9662 | -32.2062 | 100.1651  | -58.1723  | -9.7866   | -6316.4207  | 4755.8099   | 1560.6108   | -6169.96408 | 0.9629443 | 0.9335043 | 0.9395267 |
| -0.000178 | 1 | 0.4953 | 0.6085  | -1.1121 | -0.9917 | -26.9400 | 30.6980   | -9.3778   | 5.6199    | -2911.6431  | 2145.7786   | 765.8645    | -5606.19706 | 0.9613082 | 0.9262791 | 0.9426803 |
| -0.000189 | 1 | 0.4472 | 0.7446  | -1.1555 | -1.0363 | -23.8360 | 17.4915   | -1.4829   | 7.8274    | -2496.1669  | 1793.6001   | 702.5668    | -5282.95359 | 0.9598431 | 0.9204074 | 0.9458374 |
| -0.000203 | 1 | 0.4131 | 0.9505  | -1.2500 | -1.1136 | -21.5428 | 12.0950   | 1.1624    | 8.2854    | -2600.1260  | 1806.8638   | 793.2622    | -4928.47482 | 0.9582582 | 0.9147933 | 0.9479681 |
| -0.000219 | 1 | 0.4074 | 1.4503  | -1.5265 | -1.3313 | -20.7957 | 10.1222   | 2.3747    | 8.2988    | -3477.9611  | 2280.6499   | 1197.3112   | -4569.56329 | 0.9559113 | 0.9110323 | 0.9492456 |
| -0.000238 | 1 | 0.4019 | 2.3941  | -2.0763 | -1.7197 | -19.9576 | 8.6936    | 3.0514    | 8.2126    | -5194.6514  | 3275.1162   | 1919.5352   | -4201.76406 | 0.9537418 | 0.907131  | 0.9497513 |
| -0.00028  | 1 | 0.3709 | 3.1277  | -2.4761 | -2.0225 | -17.8821 | 6.7594    | 3.1497    | 7.9730    | -6276.4762  | 3893.7667   | 2382.7095   | -3565.52067 | 0.9512496 | 0.8995142 | 0.9483895 |
| -0.000356 | 1 | 0.3538 | 1.3742  | -1.3450 | -1.3831 | -16.5760 | 6.1708    | 2.9239    | 7.4813    | -2818.3601  | 1698.1363   | 1120.2238   | -2807.18492 | 0.9484862 | 0.8929576 | 0.9422426 |
| -0.000458 | 1 | 0.3559 | 1.0830  | -1.1540 | -1.2849 | -15.8712 | 5.8150    | 2.8017    | 7.2545    | -2175.7001  | 1301.8911   | 873.8090    | -2183.51231 | 0.9440609 | 0.8864134 | 0.9361453 |
| -0.000598 | 1 | 0.3617 | 0.6858  | -0.9039 | -1.1437 | -15.3553 | 5.9450    | 2.5405    | 6.8699    | -1437.5964  | 850.6852    | 586.9112    | -1672.09302 | 0.9397449 | 0.8804953 | 0.9271756 |
| -0.000788 | 1 | 0.3621 | 0.5938  | -0.8325 | -1.1233 | -14.6348 | 5.5472    | 2.3903    | 6.6973    | -1217.6023  | 720.4906    | 497.1117    | -1268.41488 | 0.9337775 | 0.8721034 | 0.9193558 |
| -0.001063 | 1 | 0.3206 | 0.4104  | -0.6893 | -1.0417 | -12.8169 | 4.4561    | 2.0762    | 6.2846    | -848.1272   | 506.9311    | 341.1961    | -940.861193 | 0.9286772 | 0.8589747 | 0.9098363 |
| -0.001469 | 1 | 0.2556 | 0.2900  | -0.5732 | -0.9725 | -10.2123 | 2.7828    | 1.7561    | 5.6734    | -555.5269   | 333.6824    | 221.8445    | -680.743346 | 0.9235397 | 0.8373921 | 0.9011645 |
| -0.001876 | 1 | 0.2223 | 0.2356  | -0.5258 | -0.9320 | -8.9264  | 2.1086    | 1.5869    | 5.2309    | -431.6577   | 169.9325    | 169.7252    | -532.96443  | 0.9186162 | 0.8212608 | 0.8938214 |
| -0.002414 | 1 | 0.1994 | 0.1805  | -0.4913 | -0.8886 | -8.3503  | 1.9289    | 1.4644    | 4.9570    | -348.1463   | 215.8188    | 132.3276    | -414.31395  | 0.9125028 | 0.8095149 | 0.8827267 |
| -0.003643 | 1 | 0.1823 | 0.0890  | -0.4569 | -0.8144 | -8.3812  | 3.0011    | 0.7355    | 4.6445    | -282.1228   | 190.5852    | 91.5376     | -274.500689 | 0.9041332 | 0.8024436 | 0.8485378 |
| -0.004776 | 1 | 0.1633 | 0.0523  | -0.4478 | -0.7678 | -8.5015  | 10.0732   | -4.3879   | 2.8162    | -588.0437   | 430.5716    | 157.4721    | -209.360783 | 0.9006532 | 0.8007058 | 0.8143359 |
| -0.005208 | 1 | 0.1368 | 0.0371  | -0.4499 | -0.7239 | -8.6547  | -14.1851  | 14.2167   | 8.6232    | 641.5077    | -493.3587   | -148.1491   | -191.999364 | 0.9019942 | 0.80357   | 0.793824  |
| -0.005009 | 1 | 0.1085 | 0.0283  | -0.4567 | -0.6800 | -8.8534  | -5.1364   | 7.8452    | 6.1446    | 196.7644    | -156.7267   | -40.0377    | -199.644945 | 0.9072602 | 0.8103603 | 0.7829003 |
| -0.004411 | 1 | 0.0782 | 0.0228  | -0.4611 | -0.6399 | -8.7032  | -4.2375   | 7.5321    | 5.4085    | 156.0753    | -127.7792   | -28.2961    | -226.720623 | 0.915202  | 0.8158612 | 0.7830267 |
| -0.00659  | 2 | 0.0205 | 0.0152  | -0.4694 | -0.5662 | -3.4599  | 0.5291    | 1.9942    | 0.9366    | -48.3180    | 40.4145     | 7.9035      | -151.744915 | 0.9261694 | 0.693692  | 0.7906238 |
